# Supplementary material for: Epithelial Cell-Derived Extracellular Vesicles Trigger the Differentiation of Two Epithelial Cell Lines
Source: MDPI journal article supplement (doi:10.3390/ijms23031718), 2022-02-02
Supplement: s1 [file s1]

| Antibody | Clone      | Host  | Isotype | Manufacturer                | Dilution |
|----------|------------|-------|---------|-----------------------------|----------|
| CD63     | Polyclonal | Mouse | IgG     | Santa Cruz<br>Biotechnology | 1:1000   |
| TSG101   | 4A10       | Mouse | IgG1    | Abcam                       | 1:1000   |
| GRP94    | 9G10       | Rat   | IgG2a   | Abcam                       | 1:1000   |
| IgG      | ---        | Mouse | ---     | ThermoFisher Scientific     | 0.2µg/µL |
| IgG1     | ---        | Mouse | ---     | ThermoFisher Scientific     | 1µg/µL   |
| IgG2a    | ---        | Rat   | ---     | ThermoFisher Scientific     | 1µg/µL   |

**Supplementary table S1:** List of primary antibodies used for exosome characterization using flow cytometry.

| Antibody   | Clone   | Host  | Reactivity | Conjugate | Manufacturer      | Dilution |
|------------|---------|-------|------------|-----------|-------------------|----------|
| Anti-mouse | A-11005 | Goat  | Mouse      | FITC      | Life Technologies | 1:1000   |
| Anti-rat   | F7512   | Sheep | Rabbit     | FITC      | Sigma-Aldrich     | 1:1000   |

**Supplementary table S2:** List of secondary antibodies used for exosome characterization using flow cytometry.

| Primer | Gene Sequence                                                 | Product size (bp) |
|--------|---------------------------------------------------------------|-------------------|
| GAPDH  | F - #<br>R - #                                                |                   |
| KRT3   | F – TTCCATCTCAGGCACAAACAA<br>R – CAGGTCCTCCATGTTCTTCAG        | 130               |
| KRT7   | F – CTCCCACCACTCCATCCT<br>R - ATCACTTTCCAGACTGTCTCACT         | 105               |
| KRT12  | F – CTCCAAATCACAAGCACAGTCA<br>R - CCACCTCACCATTACCATCT        | 98                |
| KRT13  | F – ATGCTGCTGGACATCAAGAC<br>R - TCGTGGTAACAGAGGTGCTA          | 113               |
| ΔNp63α | F – GGAAGGCGGATGAAGATAGC<br>R - CATGTGTGTTCTGACGAAACG         | 96                |
| ABCB5  | F - GGAAAGAATTACCACTACCAAGAAGG<br>R - TGGTAGCATCCAAATGGGCAAAC | 119               |

**Supplementary table S3.** List of primers used for Real Time qPCR studies. The primer sequences and the product size are included. Abbreviations used: GAPDH: glyceraldehyde-3-phosphate dehydrogenase, KRT: keratin, ABCB5: ATP binding cassette sub-family B member 5. # Sequences and product size of reference genes are not commercially provided by PrimerDesign.

| <b>Antibody</b>        | <b>Clone</b> | <b>Host</b> | <b>Isotype</b> | <b>Manufacturer</b>     | <b>Dilution</b> |
|------------------------|--------------|-------------|----------------|-------------------------|-----------------|
| KRT3                   | AE5          | Mouse       | IgG            | Abcam                   | 1:1000          |
| KRT7                   | RCK105       | Mouse       | IgG1           | Santa Cruz              | 1:500           |
| KRT12                  | J6           | Rabbit      | IgG            | Santa Cruz              | 1:1000          |
| KRT13                  | Ks13.1       | Mouse       | IgG1           | Santa Cruz              | 1:500           |
| $\Delta$ Np63 $\alpha$ | Poly6190     | Rabbit      | IgG            | BioLegend               | 1:1000          |
| IgG                    | ---          | Mouse       | ---            | ThermoFisher Scientific | #               |
| IgG                    | ---          | Rabbit      | ---            | ThermoFisher Scientific | #               |
| IgG1                   | ---          | Mouse       | ---            | ThermoFisher Scientific | #               |

**Supplementary table S4.** List of primary antibodies used for flow cytometry. # Concentration dependent on primary antibody. Abbreviations used KRT: keratin

| <b>Antibody</b> | <b>Clone</b> | <b>Host</b> | <b>Reactivity</b> | <b>Conjugate</b> | <b>Manufacturer</b> | <b>Dilution</b> |
|-----------------|--------------|-------------|-------------------|------------------|---------------------|-----------------|
| Anti-mouse      | A-11005      | Goat        | Mouse             | FITC             | Life Technologies   | 1:1000          |
| Anti-rabbit     | F7512        | Sheep       | Rabbit            | FITC             | Sigma-Aldrich       | 1:1000          |

**Supplementary table S5.** List of secondary antibodies used for flow cytometry. Abbreviations used FITC: fluorescein isothiocyanate
